# Supplementary material for: SiC7siligraphene: a novel donor material with extraordinary sunlight absorption
Source: Royal Society of Chemistry journal article supplement (doi:10.1039/c6nr00046k), 2016-01-01
Supplement: c6nr00046k1.pdf [file c6nr00046k1.pdf]

## *Electronic Supplementary Information (ESI)*

### **SiC<sub>7</sub> Siligraphene: Novel Donor Material with Extraordinary Sunlight Absorption**

Huilong Dong,<sup>a</sup> Liujiang Zhou,<sup>\*b</sup> Thomas Frauenheim,<sup>b</sup> Tingjun Hou,<sup>a</sup> Shuit-Tong  
Lee,<sup>a</sup> and Youyong Li<sup>\*a</sup>

*a. Institute of Functional Nano & Soft Materials (FUNSOM), Soochow University,  
Suzhou, Jiangsu 215123, China. E-mail: yyli@suda.edu.cn*

*b. Bremen Center for Computational Material Science, Universitat Bremen, Am  
Fallturm 1, 28359 Bremen, Germany. E-mail: liujiang86@gmail.com*

#### **More computational details**

The first-principle molecular dynamics (FPMD) simulation was carried out with constant temperature and constant volume ensemble (NVT). The temperature was set 2000, 3000, and 3500 K respectively. The total simulation time of 5 ps was carried on with time step of 1.0 fs. The Nose algorithm<sup>1</sup> was used for temperature control. The optimized g-SiC<sub>7</sub> 4×4 supercell was used as the initial structure. The phonon calculations were carried out by using the finite displacement method as implemented in the PHONOPY code.<sup>2</sup>

To compare the stability of the g-SiC<sub>7</sub> with other graphene-like 2D materials, the binding energy ( $E_b$ ) was calculated as

$$E_b = (xE_{Si} + yE_C - E_{Si_xC_y})/(x + y)$$

In this definition,  $E_{Si}$ ,  $E_C$ , and  $E_{Si_xC_y}$  represent the energies of Si atom, C atom, and Si<sub>x</sub>C<sub>y</sub> nanomaterial, respectively. The larger binding energy, the more stable the structure is.

## Absorbance calculations

The interband optical transition is relevant with the imaginary part of the dielectric tensor  $\epsilon_2(\omega)$ , which is a function of photon frequency  $\omega$ . The monolayer absorbance  $A(\omega)$  of the 2D materials, which is defined as the fraction of photon energy ( $E = \hbar\omega$ ) adsorbed by the monolayer, is calculated using the following approximation:<sup>3, 4</sup>

$$A(\omega) = \frac{\omega}{c} \epsilon_2(\omega) \Delta z$$

Here  $c$  is the speed of light, and  $\Delta z$  is the size of the simulated cell in the layer-normal direction. This formula can be viewed as a Taylor expansion for small thickness  $\Delta z$  of the absorbance  $A = 1 - e^{-\alpha \cdot \Delta z}$  for a flat layer of a bulk material with thickness  $\Delta z$

and absorption coefficient  $\alpha = \frac{\epsilon_2(\omega)}{cn}$ , with refractive index  $n = 1$  due to the presence of vacuum in the vast majority of the simulation cell. Equivalently, it can be seen as deriving from the polarizability per unit area.

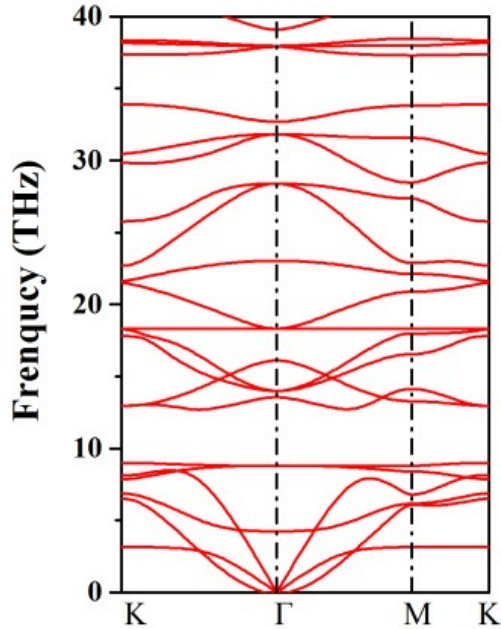

**Fig. S1** The phonon dispersion of g-SiC<sub>7</sub> siligraphene.  $\Gamma$ , K and M correspond to the  $(0, 0, 0)$ ,  $(0.333, 0.666, 0)$  and  $(0, 0.5, 0)$  k-points in the first Brillouin zone (BZ),

respectively.

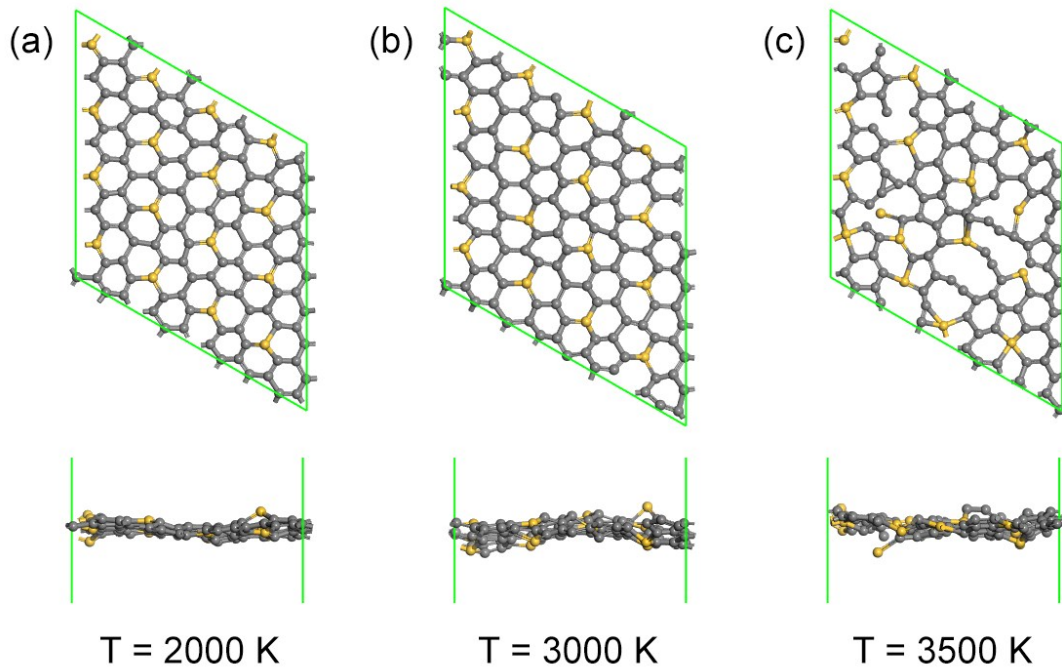

**Fig. S2** Snapshots of the g-SiC<sub>7</sub> 4×4 supercell at temperature of (a) 2000 K, (b) 3000 K and (c) 3500 K after 5 ps of the FPMD simulation. Both of the top and side views are displayed.

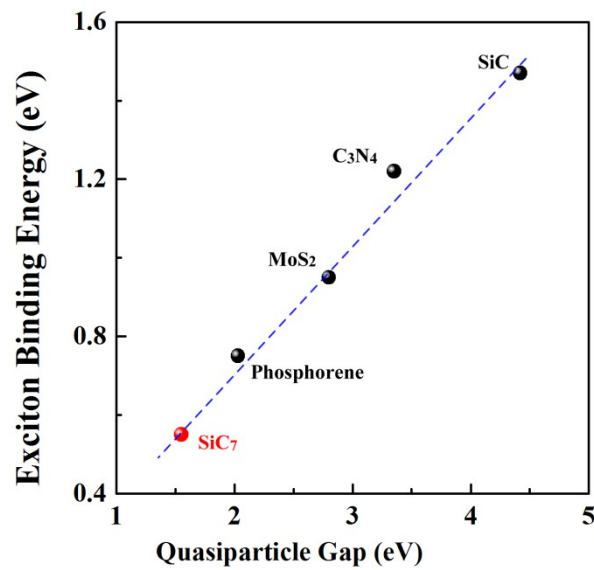

**Fig. S3** The exciton binding energy versus the QP band gap for various representative

2D materials. The dashed line represents the fitted linear relation. The exciton binding energies of SiC, C<sub>3</sub>N<sub>4</sub>, MoS<sub>2</sub> are obtained from ref.<sup>5</sup>, ref.<sup>6</sup> and ref.<sup>7</sup>, respectively.

## Reference

- 1 S. Nosé, *J. Chem. Phys.*, 1984, **81**, 511-519.
- 2 A. Togo, F. Oba and I. Tanaka, *Phys. Rev. B*, 2008, **78**, 134106.
- 3 M. Bernardi, M. Palummo and J. C. Grossman, *Nano Lett.*, 2013, **13**, 3664-3670.
- 4 L. Yang, J. Deslippe, C.-H. Park, M. L. Cohen and S. G. Louie, *Phys. Rev. Lett.*, 2009, **103**, 186802.
- 5 J.-H. Choi, P. Cui, H. Lan and Z. Zhang, *Phys. Rev. Lett.*, 2015, **115**, 066403.
- 6 W. Wei, Y. Dai, B. Huang and T. Jacob, *Phys. Chem. Chem. Phys.*, 2013, **15**, 8789-8794.
- 7 D. Y. Qiu, F. H. da Jornada and S. G. Louie, *Phys. Rev. Lett.*, 2013, **111**, 216805.
